# Supplementary material for: Higher HEI-2015 Scores Are Associated with Lower Risk of Sleep Disorder: Results from a Nationally Representative Survey of United States Adults
Source: MDPI journal article supplement (doi:10.3390/nu14040873), 2022-02-19
Supplement: s1 [file s1]

Table S1 The sensitivity analysis results of the logistics regression model from 2007-2014

| Characteristics                                      | OR (95% CI)        |                    |                    |                    |
|------------------------------------------------------|--------------------|--------------------|--------------------|--------------------|
|                                                      | Crude Model        | Model I            | Model II           | Model III          |
| <b>HEI Category (reference, Inadequate)</b>          |                    |                    |                    |                    |
| Average                                              | 0.947(0.946-0.948) | 0.917(0.916,0.918) | 0.964(0.962,0.965) | 1.013(1.012,1.015) |
| Optimal                                              | 0.809(0.808-0.810) | 0.764(0.763,0.766) | 0.861(0.860,0.862) | 0.995(0.994,0.997) |
| <b>Age Group (reference, 20-39)</b>                  |                    |                    |                    |                    |
| 40-59                                                |                    | 2.203(2.200,2.206) | 2.014(2.012,2.017) | 1.594(1.592,1.597) |
| 60+                                                  |                    | 2.319(2.316,2.322) | 1.841(1.838,1.844) | 1.317(1.315,1.320) |
| <b>Sex (reference, Female)</b>                       |                    |                    |                    |                    |
| Male                                                 |                    | 1.162(1.161,1.164) | 1.269(1.267,1.27)  | 1.362(1.361,1.364) |
| <b>Race (reference, Non-Hispanic White)</b>          |                    |                    |                    |                    |
| Mexican American                                     |                    | 0.495(0.493,0.496) | 0.501(0.499,0.502) | 0.499(0.498,0.500) |
| Non-Hispanic Black                                   |                    | 0.936(0.934,0.937) | 0.881(0.880,0.883) | 0.740(0.739,0.741) |
| Other                                                |                    | 0.797(0.795,0.798) | 0.748(0.747,0.750) | 0.769(0.768,0.771) |
| <b>Education Level (reference, &lt; High School)</b> |                    |                    |                    |                    |
| High school /GED equivalent                          |                    | 1.235(1.233,1.238) | 1.369(1.366,1.371) | 1.466(1.463,1.469) |
| College/AA degree                                    |                    | 1.318(1.316,1.320) | 1.516(1.513,1.518) | 1.586(1.583,1.589) |
| College or above                                     |                    | 1.064(1.062,1.066) | 1.351(1.348,1.354) | 1.643(1.640,1.646) |
| <b>Family Income (reference, 0~130% FPL)</b>         |                    |                    |                    |                    |
| 130%~350% FPL                                        |                    | 0.748(0.747,0.749) | 0.799(0.798,0.801) | 0.879(0.877,0.88)  |
| 350% FPL                                             |                    | 0.677(0.676,0.678) | 0.768(0.767,0.769) | 0.911(0.909,0.912) |
| <b>Smoke Status (reference, Never Smoker)</b>        |                    |                    |                    |                    |
| Former Smoker                                        |                    |                    | 1.531(1.529,1.533) | 1.432(1.430,1.433) |
| Current Smoker                                       |                    |                    | 1.517(1.515,1.520) | 1.557(1.555,1.559) |
| <b>Drink Level (reference, None)</b>                 |                    |                    |                    |                    |
| Light                                                |                    |                    | 0.96(0.959,0.9610) | 1.004(1.003,1.006) |
| Moderate                                             |                    |                    | 0.633(0.632,0.634) | 0.760(0.759,0.761) |
| Heavy                                                |                    |                    | 0.741(0.739,0.743) | 0.435(0.434,0.436) |
| <b>Caffeine Category (reference, &lt;Q1)</b>         |                    |                    |                    |                    |
| Q1~Q3                                                |                    |                    | 0.893(0.892,0.894) | 0.896(0.895,0.897) |
| >Q3                                                  |                    |                    | 0.836(0.834,0.837) | 0.795(0.794,0.797) |
| <b>Total physical activity (reference, 0)</b>        |                    |                    |                    |                    |
| 1-149                                                |                    |                    | 0.765(0.764,0.767) | 0.876(0.874,0.878) |
| 150-299                                              |                    |                    | 0.740(0.739,0.742) | 0.884(0.882,0.885) |
| ≥300                                                 |                    |                    | 0.614(0.613,0.615) | 0.767(0.766,0.768) |
| <b>BMI Category (reference, Normal Weight)</b>       |                    |                    |                    |                    |
| Underweight                                          |                    |                    |                    | 1.218(1.212,1.224) |
| Overweight                                           |                    |                    |                    | 1.207(1.205,1.209) |
| Obese                                                |                    |                    |                    | 2.544(2.540,2.548) |
| <b>Hypertension (reference, No)</b>                  |                    |                    |                    |                    |
| Yes                                                  |                    |                    |                    | 1.642(1.640,1.644) |
| <b>Diabetes (reference, No)</b>                      |                    |                    |                    |                    |
| Yes                                                  |                    |                    |                    | 1.509(1.507,1.511) |
| <b>Depression (reference, No)</b>                    |                    |                    |                    |                    |
| Yes                                                  |                    |                    |                    | 3.021(3.016,3.025) |

Sample size = 18419; OR = Odds Ratio; 95% CI = 95% Confidence Interval; HEI = Healthy Eating Index; BMI = Body Mass Index. Model I: Adjust for sociodemographic characteristics. Model II: Adjust for sociodemographic characteristics and behavioral characteristics. Model III: Adjust for sociodemographic characteristics, behavioral characteristics, and health characteristics.

Table S2. The sensitivity analysis results of the Weighted Quantile Sum regression model

| <b>Model</b> | <b>OR</b> | <b>95% CI</b> | <b>P-Value</b> |
|--------------|-----------|---------------|----------------|
| Model I      | 0.975     | (0.963,0.987) | <0.001         |
| Model II     | 0.984     | (0.972,0.996) | 0.008          |
| Model III    | 0.987     | (0.975,0.999) | 0.034          |

OR = Odds Ratio; 95% CI = 95% Confidence Interval. Model I: Adjust for sociodemographic characteristics. Model II: Adjust for sociodemographic characteristics and behavioral characteristics. Model III: Adjust for sociodemographic characteristics, behavioral characteristics, and health characteristics.

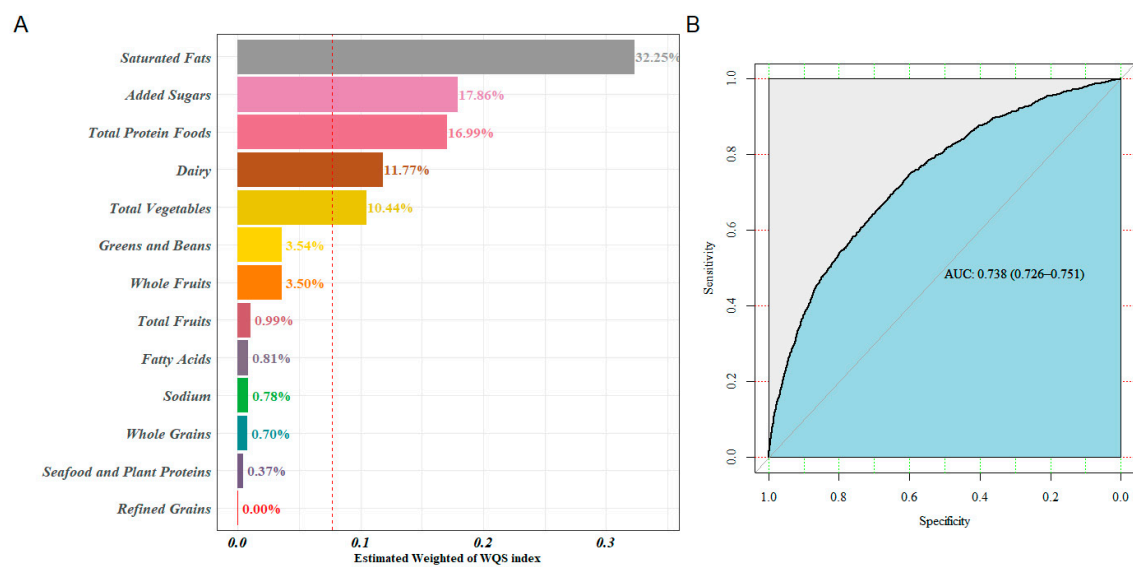

Figure S1 The sensitivity analysis results of (A) WQS regression index weights for sleep disorders; (B) The ROC curve of the WQS model.
